# Supplementary material for: Tomato Seed Coat Permeability to Selected Carbon Nanomaterials and Enhancement of Germination and Seedling Growth
Source: Hindawi journal article supplement (doi:10.1155/2015/419215), 2015-01-01
Supplement: f1 [file 419215.f1.pdf]

## Supplemental Information.

### *Nanoparticle Suspension Preparations and Characterization*

The hydrophobic nature of MWNTs required the presence of an amphiphilic-solubilizing factor for a stable suspension of these NMs. Gallic (GA) a type of phenolic acid, is an ideal compound to enhance the bioavailability and dispersion of NMs. Specifically, the abundance of GA in plants, its significant therapeutic properties [35, 36], and great possibility to interact with CBNMs rendered it useful in this particular study [37].  $C_{60}(OH)_{20}$  (BuckyUSA), MWNTs (Sigma, outer diameter: 40–70 nm, inner diameter: 5–40 nm, length: 0.5–2  $\mu$ m, purity: 95+ %), and GA (Sigma, G7384) were used as purchased. 500 mg/L samples of all stock solutions,  $C_{60}(OH)_{20}$ , MWNT-GA, and GA were prepared according to the following protocols.  $C_{60}(OH)_{20}$  and GA were dissolved directly into MilliQ water and sonicated for 10 min to prevent agglomeration. MWNTs were added to the GA suspensions, the concentration of each being 500 mg/mL. After probe sonication at 8W for 60 min (VC130 PB, Sonics & Materials, Inc.), the sample was vortexed, and its absorbance was measured immediately and after 24 hours (Biomate 3,  $\lambda = 400$  nm). No significant difference was detected in the absorbance values, indicating that negligible sample precipitation occurred during first 24 hours (data not shown). The size distributions of the  $C_{60}(OH)_{20}$ , GA and MWNT-GA were determined using dynamic light scattering (Malvern, nanosizer S90; range 0.3 nm–5  $\mu$ m, resolution 1 nm) at room temperature (see SI, Figure S1). The major peak values at  $\sim 1.2$  nm and 227 nm were identified for the 50 mg/L of  $C_{60}(OH)_{20}$ , MWNT-GA suspensions accordingly. Good dispersability and stability of  $C_{60}(OH)_{20}$  and MWNT-GA (see for example, Figure S1) suspensions were confirmed by their negative zeta potentials, of -51.1 mV and -29.4 mV, respectively (ZetaSizerNano ZS) in MilliQ water (see SI, Table S1). The solubility of NMs is attributed to the formation of the hydrogen bonds between the hydroxyl groups of the  $C_{60}(OH)_{20}$  and oxygen atoms of water [38, 39], and hydrophobic interaction and pi-pi stacking between the hydrophobic moieties of GA and the surface of MWNT (Salonen *et al.*, 2008). The key physical parameters of all suspensions are summarized in the supporting information (see SI, Table S1). MWNT-GA,  $C_{60}(OH)_{20}$  and GA suspensions were diluted into nominal concentrations 50 mg/L using MilliQ and used in all experiments.

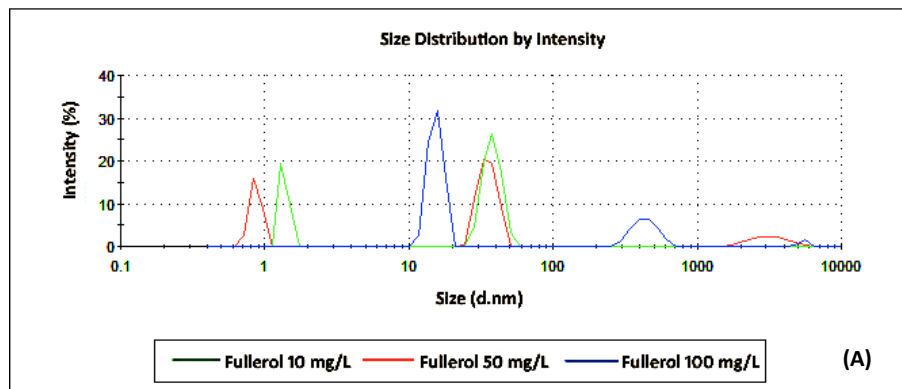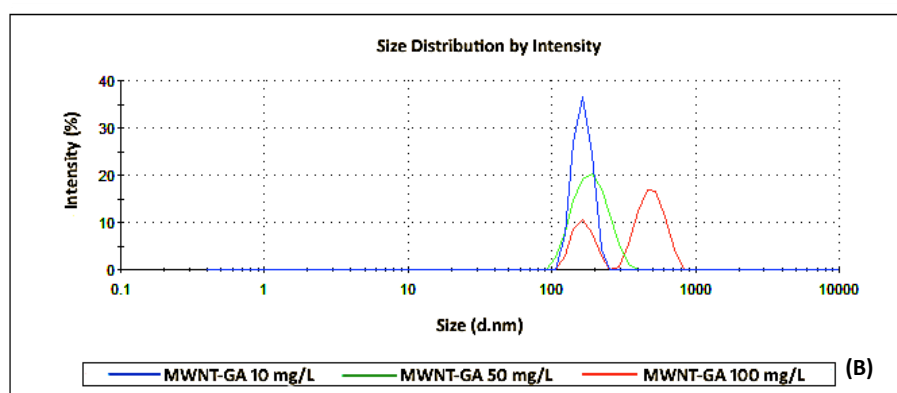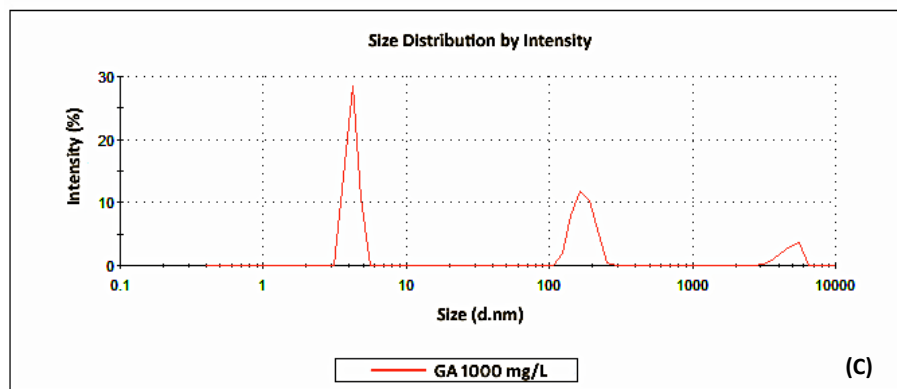

Figure S1.  $C_{60}(OH)_{20}$ , MWNT-GA and GA size distribution measured by a nanosizer (Zetasizer S90).

The parameter “size” as determined by the Zetasizer refers to the hydrodynamic diameter of a Rayleigh particle. According to Rayleigh’s approximation, the intensity of scattering of a particle is proportional to the sixth power of its diameter.

(A) The sample of C<sub>60</sub>(OH)<sub>20</sub> in Milli-Q water displayed size peaks at 1.36 nm (10 mg/L), 0.93 nm (50 mg/L) and 10.77 nm (100 mg/L). The registered larger particles sizes were possibly due to the nanoparticle aggregation in Milli-Q water through the formation of hydrogen bonds in Milli-Q water or possibly due possible contamination in the suspension. Major size distribution peak of 50 mg/L C<sub>60</sub>(OH)<sub>20</sub> was  $1.2 \pm 0.4$  nm (PdI =  $0.516 \pm 0.090$ )

(B) The sample of MWNT-GA in Milli-Q water displayed size distribution peaks at 172.06 nm (10 mg/L), 188.88 nm (50 mg/L) and 180.53 nm and 430.33 nm (100 mg/L). Major size distribution peak of 50 mg/L MWNT-GA was  $227.1 \pm 38.7$  nm (PdI =  $0.237 \pm 0.069$ ).

(C) The size distribution of GA of 10, 50, 100 mg/L concentrations were not detectable (count rate was too low). The sample of GA 1000mg/L displayed the major distribution peak at  $5.59 \pm 1.10$  nm (PdI =  $0.376 \pm 0.042$ ). The registered larger particles sizes were possibly due to the GA aggregation in Milli-Q water or presence of dust.

All measurements were done in triplicate.

Table S1. Characterization of GA suspension and C<sub>60</sub>(OH)<sub>20</sub>, MWNT-GA nanomaterials.

|                 | Hydrodynamic diameter (nm) | Zeta Potential (mV) | Polydispersity Index |
|-----------------|----------------------------|---------------------|----------------------|
| <b>GA</b>       | $5.61 \pm 1.12$            | $-2.33 \pm 1.37$    | $0.37 \pm 0.04$      |
| <b>Fullerol</b> | $1.17 \pm 0.36$            | $-51.05 \pm 4.85$   | $0.52 \pm 0.09$      |
| <b>MWNT-GA</b>  | $223.08 \pm 38.72$         | $-29.40 \pm 1.54$   | $0.24 \pm 0.07$      |

Results represent mean  $\pm$  standard deviation of three experiments.
